# Supplementary material
Source: MDPI journal article supplement (https://www.mdpi.com/1999-4907/7/7/151)
Supplement: s1 [file s1]

Supplementary Materials: Spatial Heterogeneity of Climate Change Effects on Dominant Height for Larch Plantations in Northern and Northeastern China

Hao Zang, Xiangdong Lei, Wu Ma and Weisheng Zeng

**Table S1.** Predicted stand dominant height under future climate scenarios by provinces.

| **Province** | **Period** | **Climatic Scenario** | **TWQ** | | | | **PWM** | | | | **Dominant Height** | | | |
| --- | --- | --- | --- | --- | --- | --- | --- | --- | --- | --- | --- | --- | --- | --- |
| **Mean** | **SD** | **TWQ** | **ΔTWQ %** | **Mean** | **SD** | **ΔPWM** | **ΔPWM %** | **Mean** | **SD** | **ΔH** | **ΔH %** |
| Beijing | 1950–2000 | Current | 20.0 | 1.75 | 0.0 | 0.00% | 164.6 | 11.71 | 0.0 | 0.00% | 8.9 | 1.44 | 0.00 | 0.00% |
|  | 2041–2060 | RCP2.6 | 22.3 | 1.76 | 2.3 | 11.62% | 143.2 | 9.53 | −21.4 | −13.00% | 8.3 | 1.39 | −0.61 | −6.91% |
|  |  | RCP4.5 | 22.0 | 1.74 | 2.0 | 10.22% | 201.9 | 12.97 | 37.3 | 22.66% | 10.5 | 1.50 | 1.60 | 18.18% |
|  |  | RCP8.5 | 23.2 | 1.74 | 3.2 | 16.23% | 162.4 | 8.54 | −2.2 | −1.34% | 9.1 | 1.40 | 0.19 | 2.30% |
|  | 2061–2080 | RCP2.6 | 22.4 | 1.70 | 2.5 | 12.27% | 170.8 | 10.55 | 6.2 | 3.77% | 9.4 | 1.41 | 0.45 | 5.19% |
|  |  | RCP4.5 | 22.8 | 1.73 | 2.8 | 14.13% | 178.5 | 11.58 | 13.9 | 8.44% | 9.7 | 1.37 | 0.77 | 8.92% |
|  |  | RCP8.5 | 23.8 | 2.43 | 3.9 | 19.39% | 154.0 | 10.54 | −10.6 | −6.44% | 8.8 | 1.56 | −0.12 | −1.18% |
| Hebei | 1950–2000 | Current | 17.0 | 1.76 | 0.0 | 0.00% | 137.3 | 14.72 | 0.0 | 0.00% | 8.1 | 1.68 | 0.00 | 0.00% |
|  | 2041–2060 | RCP2.6 | 19.4 | 1.74 | 2.5 | 14.69% | 114.7 | 11.91 | −22.6 | −16.43% | 7.6 | 1.59 | −0.51 | −6.32% |
|  |  | RCP4.5 | 19.0 | 1.74 | 2.1 | 12.33% | 172.4 | 19.17 | 35.1 | 25.57% | 9.5 | 1.89 | 1.39 | 17.37% |
|  |  | RCP8.5 | 20.2 | 1.77 | 3.3 | 19.41% | 140.4 | 9.19 | 3.1 | 2.28% | 8.5 | 1.78 | 0.44 | 5.48% |
|  | 2061–2080 | RCP2.6 | 19.1 | 1.78 | 2.2 | 12.90% | 148.6 | 13.51 | 11.3 | 8.24% | 8.7 | 1.77 | 0.60 | 7.56% |
|  |  | RCP4.5 | 19.7 | 1.76 | 2.7 | 16.00% | 171.0 | 15.62 | 33.7 | 24.52% | 9.5 | 1.93 | 1.42 | 17.71% |
|  |  | RCP8.5 | 23.2 | 2.14 | 6.3 | 36.89% | 209.9 | 66.40 | 72.6 | 52.90% | 11.4 | 3.69 | 3.28 | 40.99% |
| Heilongjiang | 1950–2000 | Current | 19.0 | 1.49 | 0.0 | 0.00% | 142.3 | 15.77 | 0.0 | 0.00% | 10.6 | 3.00 | 0.00 | 0.00% |
|  | 2041–2060 | RCP2.6 | 21.3 | 1.64 | 2.3 | 12.31% | 154.0 | 12.57 | 11.6 | 8.18% | 11.3 | 3.09 | 0.70 | 6.84% |
|  |  | RCP4.5 | 21.5 | 1.41 | 2.5 | 13.14% | 154.3 | 14.03 | 12.0 | 8.41% | 11.3 | 3.05 | 0.73 | 7.24% |
|  |  | RCP8.5 | 22.4 | 1.54 | 3.4 | 18.17% | 154.2 | 11.93 | 11.9 | 8.35% | 11.4 | 3.12 | 0.84 | 8.24% |
|  | 2061–2080 | RCP2.6 | 20.8 | 1.48 | 1.9 | 9.83% | 151.4 | 15.76 | 9.1 | 6.38% | 11.1 | 3.12 | 0.56 | 5.33% |
|  |  | RCP4.5 | 22.0 | 1.57 | 3.0 | 16.05% | 140.5 | 14.75 | −1.9 | −1.32% | 10.8 | 2.91 | 0.27 | 3.06% |
|  |  | RCP8.5 | 23.1 | 1.24 | 4.1 | 21.77% | 188.5 | 31.67 | 46.1 | 32.41% | 12.7 | 3.35 | 2.11 | 21.05% |
| Jilin | 1950–2000 | Current | 19.5 | 1.40 | 0.0 | 0.00% | 185.1 | 26.22 | 0.0 | 0.00% | 11.6 | 2.89 | 0.00 | 0.00% |
|  | 2041–2060 | RCP2.6 | 21.8 | 1.54 | 2.3 | 11.59% | 179.1 | 22.03 | −6.0 | −3.26% | 11.6 | 2.77 | 0.01 | 0.62% |
|  |  | RCP4.5 | 21.7 | 1.40 | 2.2 | 11.14% | 206.2 | 31.17 | 21.1 | 11.40% | 12.6 | 3.00 | 1.01 | 9.10% |
|  |  | RCP8.5 | 22.8 | 1.50 | 3.2 | 16.58% | 195.6 | 23.59 | 10.5 | 5.69% | 12.3 | 2.89 | 0.76 | 6.98% |
|  | 2061–2080 | RCP2.6 | 21.4 | 1.44 | 1.8 | 9.41% | 208.9 | 30.64 | 23.8 | 12.88% | 12.6 | 3.07 | 1.08 | 9.53% |
|  |  | RCP4.5 | 22.4 | 1.41 | 2.9 | 14.78% | 194.0 | 33.26 | 8.9 | 4.82% | 12.3 | 2.99 | 0.70 | 6.18% |
|  |  | RCP8.5 | 22.2 | 2.03 | 2.7 | 13.74% | 184.3 | 43.23 | −0.8 | −0.42% | 11.8 | 3.24 | 0.29 | 3.16% |
| Liaoning | 1950–2000 | Current | 21.1 | 0.94 | 0.0 | 0.00% | 225.7 | 31.04 | 0.0 | 0.00% | 13.1 | 3.03 | 0.00 | 0.00% |
|  | 2041–2060 | RCP2.6 | 23.3 | 0.99 | 2.2 | 10.45% | 215.7 | 38.24 | −10.0 | −4.41% | 13.1 | 3.03 | −0.01 | −0.10% |
|  |  | RCP4.5 | 23.1 | 0.93 | 2.0 | 9.63% | 269.2 | 42.14 | 43.6 | 19.30% | 14.8 | 3.38 | 1.75 | 13.48% |
|  |  | RCP8.5 | 23.6 | 1.05 | 2.5 | 11.98% | 233.6 | 34.85 | 7.9 | 3.50% | 13.7 | 3.18 | 0.65 | 5.00% |
|  | 2061–2080 | RCP2.6 | 22.4 | 1.20 | 1.3 | 6.35% | 258.3 | 36.81 | 32.7 | 14.49% | 14.4 | 3.30 | 1.28 | 9.84% |
|  |  | RCP4.5 | 23.8 | 0.95 | 2.7 | 12.89% | 264.9 | 35.86 | 39.2 | 17.39% | 14.8 | 3.30 | 1.72 | 13.42% |
|  |  | RCP8.5 | 22.2 | 2.56 | 1.1 | 5.20% | 182.6 | 46.81 | −43.0 | −19.06% | 11.9 | 3.71 | −1.17 | −9.13% |
| Inner Mongolia | 1950–2000 | Current | 16.1 | 1.71 | 0.0 | 0.00% | 134.1 | 10.97 | 0.0 | 0.00% | 9.3 | 2.33 | 0.00 | 0.00% |
|  | 2041–2060 | RCP2.6 | 18.5 | 1.83 | 2.3 | 14.55% | 131.7 | 20.35 | −2.4 | −1.81% | 9.5 | 2.50 | 0.22 | 2.11% |
|  |  | RCP4.5 | 18.6 | 1.66 | 2.5 | 15.21% | 161.2 | 18.05 | 27.1 | 20.23% | 10.5 | 2.54 | 1.20 | 13.26% |
|  |  | RCP8.5 | 19.6 | 1.70 | 3.5 | 21.79% | 135.0 | 10.83 | 0.9 | 0.64% | 9.7 | 2.42 | 0.46 | 5.14% |
|  | 2061–2080 | RCP2.6 | 18.2 | 1.73 | 2.0 | 12.60% | 140.4 | 13.26 | 6.3 | 4.72% | 9.7 | 2.37 | 0.45 | 5.18% |
|  |  | RCP4.5 | 18.9 | 1.79 | 2.7 | 17.05% | 159.0 | 16.38 | 24.9 | 18.54% | 10.4 | 2.42 | 1.15 | 13.01% |
|  |  | RCP8.5 | 23.2 | 1.56 | 7.1 | 44.18% | 165.7 | 21.97 | 31.6 | 23.59% | 11.2 | 2.80 | 1.96 | 21.72% |
| Shanxi | 1950–2000 | Current | 14.7 | 1.35 | 0.0 | 0.00% | 141.7 | 13.56 | 0.0 | 0.00% | 8.6 | 1.86 | 0.00 | 0.00% |
|  | 2041–2060 | RCP2.6 | 17.0 | 1.35 | 2.3 | 15.50% | 140.3 | 10.27 | −1.4 | −0.96% | 8.8 | 1.87 | 0.24 | 2.87% |
|  |  | RCP4.5 | 17.3 | 1.52 | 2.6 | 17.62% | 153.6 | 19.03 | 11.9 | 8.40% | 9.3 | 2.10 | 0.73 | 8.41% |
|  |  | RCP8.5 | 18.1 | 1.41 | 3.3 | 22.49% | 143.9 | 13.30 | 2.3 | 1.59% | 9.1 | 1.99 | 0.50 | 5.79% |
|  | 2061–2080 | RCP2.6 | 16.3 | 1.66 | 1.6 | 10.64% | 135.0 | 12.48 | −6.6 | −4.68% | 8.6 | 1.92 | 0.01 | −0.05% |
|  |  | RCP4.5 | 17.9 | 1.45 | 3.1 | 21.27% | 149.7 | 9.08 | 8.1 | 5.70% | 9.2 | 1.98 | 0.65 | 7.68% |
|  |  | RCP8.5 | 19.3 | 1.36 | 4.6 | 31.13% | 130.7 | 10.69 | −11.0 | −7.73% | 8.7 | 1.93 | 0.19 | 2.33% |

ΔTWQ, ΔPWM and ΔH were the mean values of each plot under future climatic scenarios minus those of the current climate; ΔTWQ %, ΔPWM % and ΔH % were the values of ΔTWQ, ΔPWM and ΔH divided by the values of TWQ, PWM and H under current climate, respectively.

File S1. Details in Eliminating Variables

To determine which factor could impact dominant height growth, 3 topography variables, 19 climate variables and 15 soil variables which were altitude, slope, aspect, annual mean temperature (BIO1), mean diurnal range (BIO2), isothermality (BIO3), temperature seasonality (BIO4), maximum temperature of warmest month (BIO5), minimum temperature of coldest month (BIO6), temperature annual range (BIO7), mean temperature of wettest quarter (TWQ), mean temperature of driest quarter (BIO9), mean temperature of warmest quarter (BIO10), mean temperature of coldest quarter (BIO11), annual precipitation (BIO12), precipitation of wettest month (PWM), precipitation of driest month (BIO14), precipitation seasonality (BIO15), precipitation of wettest quarter (BIO16), precipitation of driest quarter (BIO17), precipitation of warmest quarter (BIO18), precipitation of coldest quarter (BIO19), pH value (PH), soil organic matter (SOM), total nitrogen (TN), total phosphorus (TP), total potassium (TK), alkali-hydrolysable nitrogen (AN), available phosphorus (AP), available potassium (AK), cation exchange capacity (CEC), exchangeable H+ (HE), exchangeable Ca2+ (CAE), exchangeable Mg2+ (MGE), exchangeable K+ (KE), exchangeable Na+ (NAE) and bulk density (BD) were used to express the parameters in the Gompertz function (Equation (S1) in manuscript) to ensure that their influence on dominant height growth can be assessed. To avoid over-parameterization and multi-collinearity in the model, backward stepwise regression was used firstly to reduce variables and then variables which variance inflation factor (VIF) less than 5 were selected. Finally, relative weight method was used to the variables that used to express the parameters in the Gompertz function. And alpha = 0.05 were used to determine the form of dominant height growth model.

In this study, backward stepwise regression was implemented based on the relationship between dominant height and candidate variables. For the comparable purpose, stand age (Age) was also regarded as a candidate variable. Tables S2 and S3 showed the details of eliminating variables by backward stepwise regression. The variable was eliminated if the smallest Akaike’s information criterion (AIC) can be got. As BIO7 and BIO19 violated the perfect multi-collinearity assumption and impeded the implementing of back stepwise regression, BIO7 and BIO19 were eliminated at the beginning of stepwise regression.

**Table S2.** Details of1th-9th backward stepwise regression.

| **Variable** | **AIC** | | | | | | | | |
| --- | --- | --- | --- | --- | --- | --- | --- | --- | --- |
| **1st** | **2nd** | **3rd** | **4th** | **5th** | **6th** | **7th** | **8th** | **9th** |
| CEC | **1690.96** |  |  |  |  |  |  |  |  |
| TK | 1691.10 | **1689.12** |  |  |  |  |  |  |  |
| PH | 1691.14 | 1689.18 | **1687.38** |  |  |  |  |  |  |
| AP | 1691.21 | 1689.28 | 1687.38 | **1685.56** |  |  |  |  |  |
| BIO4 | 1691.20 | 1689.22 | 1687.39 | 1685.66 | **1683.82** |  |  |  |  |
| MGE | 1691.27 | 1689.31 | 1687.44 | 1685.81 | 1683.86 | **1682.09** |  |  |  |
| AK | 1691.43 | 1689.55 | 1687.84 | 1685.92 | 1683.93 | 1682.17 | **1680.44** |  |  |
| BIO14 | 1691.38 | 1689.40 | 1687.58 | 1685.85 | 1684.02 | 1682.30 | 1680.55 | **1678.82** |  |
| HE | 1691.52 | 1689.52 | 1687.84 | 1686.09 | 1684.31 | 1682.53 | 1680.76 | 1679.15 | **1677.43** |
| BIO15 | 1691.72 | 1689.74 | 1687.91 | 1686.06 | 1684.37 | 1682.74 | 1681.03 | 1679.30 | 1677.55 |
| BIO16 | 1691.53 | 1689.57 | 1687.78 | 1686.01 | 1684.22 | 1683.00 | 1681.23 | 1679.47 | 1677.71 |
| BIO2 | 1692.07 | 1690.09 | 1688.26 | 1686.47 | 1684.61 | 1682.90 | 1681.14 | 1679.48 | 1677.80 |
| Slope | 1692.35 | 1690.41 | 1688.56 | 1686.74 | 1684.99 | 1683.24 | 1681.63 | 1680.03 | 1678.37 |
| TN | 1693.12 | 1691.13 | 1689.87 | 1688.09 | 1686.11 | 1684.30 | 1682.45 | 1680.87 | 1679.30 |
| BIO17 | 1692.79 | 1690.83 | 1689.09 | 1687.31 | 1685.39 | 1683.68 | 1682.02 | 1680.24 | 1679.02 |
| TP | 1692.97 | 1690.98 | 1688.98 | 1687.22 | 1685.34 | 1683.63 | 1681.90 | 1680.70 | 1679.10 |
| BIO9 | 1693.62 | 1691.64 | 1689.76 | 1687.89 | 1686.06 | 1684.28 | 1682.48 | 1680.85 | 1679.17 |
| BIO18 | 1691.73 | 1689.78 | 1688.00 | 1686.26 | 1684.46 | 1683.38 | 1681.61 | 1679.88 | 1678.18 |
| BIO6 | 1692.22 | 1690.24 | 1688.37 | 1686.69 | 1684.92 | 1683.28 | 1681.54 | 1679.88 | 1678.53 |
| altitude | 1694.17 | 1692.21 | 1690.29 | 1688.54 | 1686.63 | 1685.23 | 1683.49 | 1681.79 | 1679.95 |
| BIO11 | 1694.64 | 1692.67 | 1690.83 | 1689.30 | 1687.59 | 1686.05 | 1684.20 | 1682.57 | 1681.89 |
| SOM | 1694.73 | 1692.94 | 1692.17 | 1690.78 | 1688.85 | 1687.04 | 1685.66 | 1684.45 | 1682.67 |
| Aspect | 1695.02 | 1693.03 | 1691.22 | 1689.35 | 1687.52 | 1685.74 | 1684.04 | 1682.74 | 1681.00 |
| BIO12 | 1695.72 | 1693.78 | 1692.04 | 1690.07 | 1688.36 | 1686.74 | 1685.02 | 1683.12 | 1681.15 |
| TWQ | 1696.74 | 1694.79 | 1693.09 | 1691.34 | 1689.89 | 1687.91 | 1685.96 | 1684.37 | 1682.91 |
| BD | 1697.13 | 1695.38 | 1693.45 | 1692.29 | 1690.37 | 1688.54 | 1687.71 | 1686.98 | 1685.07 |
| BIO1 | 1697.56 | 1695.70 | 1693.91 | 1692.44 | 1690.79 | 1689.02 | 1687.05 | 1685.49 | 1685.20 |
| BIO3 | 1698.45 | 1696.45 | 1694.60 | 1692.77 | 1690.90 | 1689.75 | 1687.95 | 1686.43 | 1684.96 |
| CAE | 1701.87 | 1700.04 | 1698.80 | 1697.23 | 1695.25 | 1693.45 | 1692.28 | 1690.80 | 1689.13 |
| BIO5 | 1706.19 | 1704.41 | 1702.51 | 1700.86 | 1699.31 | 1697.37 | 1695.60 | 1694.01 | 1692.13 |
| BIO10 | 1709.52 | 1708.02 | 1706.34 | 1704.94 | 1704.14 | 1702.45 | 1700.49 | 1699.04 | 1698.73 |
| PWM | 1710.83 | 1709.06 | 1707.31 | 1705.56 | 1703.74 | 1702.72 | 1701.15 | 1699.79 | 1698.02 |
| NAE | 1714.71 | 1715.62 | 1716.20 | 1714.27 | 1714.93 | 1713.45 | 1714.45 | 1713.61 | 1711.67 |
| AN | 1715.92 | 1713.95 | 1713.87 | 1711.87 | 1714.87 | 1713.68 | 1718.80 | 1722.00 | 1720.27 |
| KE | 1716.12 | 1717.00 | 1717.31 | 1715.39 | 1715.84 | 1714.38 | 1715.45 | 1714.61 | 1712.68 |
| Age | 3073.86 | 3071.90 | 3072.97 | 3071.11 | 3069.71 | 3069.10 | 3067.56 | 3068.43 | 3076.73 |
| None | 1692.94 | 1690.96 | 1689.12 | 1687.38 | 1685.56 | 1683.82 | 1682.09 | 1680.44 | 1678.82 |

None means no variables were eliminated in this turn, values in bold means these variables were eliminated in this turn.

**Table S3**. Details of 10th–18th backward stepwise regression.

| **Variable** | **AIC** | | | | | | | | |
| --- | --- | --- | --- | --- | --- | --- | --- | --- | --- |
| **10th** | **11th** | **12th** | **13th** | **14th** | **15th** | **16th** | **17th** | **18th** |
| bio15 | **1676.10** |  |  |  |  |  |  |  |  |
| bio16 | 1676.39 | **1674.92** |  |  |  |  |  |  |  |
| bio2 | 1676.26 | 1674.92 | **1673.81** |  |  |  |  |  |  |
| Slope | 1677.01 | 1675.59 | 1674.54 | **1673.51** |  |  |  |  |  |
| TN | 1677.65 | 1676.25 | 1674.84 | 1673.81 | **1673.03** |  |  |  |  |
| bio17 | 1677.51 | 1676.56 | 1674.76 | 1673.52 | 1673.06 | **1672.54** |  |  |  |
| TP | 1677.76 | 1676.42 | 1675.20 | 1674.12 | 1673.61 | 1672.69 | **1672.03** |  |  |
| bio9 | 1677.79 | 1676.40 | 1675.10 | 1673.96 | 1673.79 | 1673.41 | 1672.37 | **1671.43** |  |
| bio18 | 1676.91 | 1675.85 | 1678.43 | 1678.10 | 1677.57 | 1677.50 | 1679.73 | 1678.69 | 1679.16 |
| bio6 | 1677.26 | 1675.67 | 1674.60 | 1680.89 | 1680.14 | 1679.92 | 1681.33 | 1680.91 | 1679.22 |
| altitude | 1678.47 | 1677.58 | 1676.33 | 1676.02 | 1675.09 | 1674.87 | 1674.65 | 1674.45 | 1674.32 |
| bio11 | 1680.85 | 1679.21 | 1678.23 | 1681.46 | 1680.94 | 1679.91 | 1682.31 | 1681.79 | 1682.47 |
| SOM | 1680.68 | 1679.22 | 1677.84 | 1676.83 | 1676.02 | 1674.61 | 1674.02 | 1676.58 | 1675.95 |
| Aspect | 1679.75 | 1678.48 | 1677.38 | 1676.14 | 1676.71 | 1675.86 | 1675.37 | 1674.45 | 1673.69 |
| bio12 | 1679.54 | 1679.90 | 1677.92 | 1676.24 | 1676.05 | 1675.30 | 1673.42 | 1673.35 | 1672.50 |
| TWQ | 1681.53 | 1680.70 | 1679.95 | 1677.98 | 1677.95 | 1677.74 | 1679.88 | 1679.47 | 1679.26 |
| BD | 1683.54 | 1682.11 | 1681.49 | 1680.51 | 1679.98 | 1678.82 | 1678.44 | 1677.40 | 1676.58 |
| bio1 | 1684.31 | 1682.69 | 1681.66 | 1683.04 | 1682.82 | 1681.48 | 1683.13 | 1682.11 | 1681.07 |
| bio3 | 1683.25 | 1681.93 | 1681.06 | 1683.81 | 1682.59 | 1682.05 | 1682.46 | 1681.96 | 1681.43 |
| CAE | 1692.89 | 1691.17 | 1689.88 | 1688.59 | 1688.11 | 1686.27 | 1686.74 | 1684.74 | 1684.08 |
| bio5 | 1690.25 | 1688.29 | 1689.48 | 1689.29 | 1688.52 | 1688.25 | 1690.20 | 1689.36 | 1687.57 |
| bio10 | 1697.29 | 1695.33 | 1693.39 | 1691.43 | 1691.47 | 1690.53 | 1696.00 | 1694.89 | 1693.41 |
| PWM | 1696.24 | 1695.93 | 1697.33 | 1697.06 | 1695.97 | 1696.44 | 1695.17 | 1694.27 | 1695.52 |
| NAE | 1710.44 | 1708.88 | 1707.35 | 1706.08 | 1705.30 | 1704.63 | 1704.32 | 1703.50 | 1703.07 |
| AN | 1719.88 | 1719.15 | 1717.66 | 1716.66 | 1718.52 | 1729.01 | 1729.25 | 1728.71 | 1729.00 |
| KE | 1711.96 | 1710.36 | 1708.81 | 1707.47 | 1706.59 | 1705.49 | 1705.20 | 1704.30 | 1703.86 |
| Age | 3074.91 | 3077.67 | 3079.87 | 3079.86 | 3077.94 | 3080.52 | 3078.72 | 3079.18 | 3079.97 |
| None | 1677.43 | 1676.10 | 1674.92 | 1673.81 | 1673.51 | 1673.03 | 1672.54 | 1672.03 | 1671.43 |

None means no variables were eliminated in this turn, values in bold means these variables were eliminated in this turn.

After backward stepwise regression, 20 variables were selected to test multi-collinearity. A linear model which regarded dominant height as dependent variable and regarded 20 candidate variables as independent variables was constructed. The variable which had the largest VIF was eliminated in each turn. And the details were shown in Table S4.

**Table S4.** Details of eliminating variables byVIF and relative weight.

| **Variable** | **VIF** | | | | | | | | | **Relative Weight** |
| --- | --- | --- | --- | --- | --- | --- | --- | --- | --- | --- |
| **19th** | **20th** | **21st** | **22nd** | **23rd** | **24th** | **25th** | **26th** | **27th** | **28th** |
| BIO1 | **935.14** |  |  |  |  |  |  |  |  |  |
| KE | 467.69 | **461.50** |  |  |  |  |  |  |  |  |
| BIO10 | 599.16 | 325.91 | **325.90** |  |  |  |  |  |  |  |
| BIO3 | 924.82 | 259.95 | 259.74 | **226.61** |  |  |  |  |  |  |
| BIO18 | 206.22 | 205.82 | 205.38 | 203.91 | **193.97** |  |  |  |  |  |
| BIO5 | 110.49 | 110.44 | 110.44 | 55.44 | 52.34 | **46.78** |  |  |  |  |
| BIO12 | 92.40 | 92.34 | 91.99 | 90.95 | 70.33 | 13.64 | **13.31** |  |  |  |
| altitude | 13.04 | 12.04 | 12.03 | 11.83 | 9.47 | 9.03 | 8.06 | **7.65** |  |  |
| Age | 1.06 | 1.06 | 1.06 | 1.05 | 1.05 | 1.05 | 1.04 | 1.04 | 1.03 | 66.71 |
| BIO6 | 185.93 | 163.77 | 163.59 | 158.49 | 7.29 | 5.24 | 2.25 | 2.14 | 1.91 | **0.70** |
| TWQ | 12.60 | 12.13 | 12.09 | 9.70 | 4.53 | 3.88 | 3.23 | 3.19 | 2.58 | 10.24 |
| BIO11 | 101.68 | 100.01 | 99.99 | 35.25 | 30.99 | 30.07 | 5.96 | 5.70 | 2.13 | **1.23** |
| PWM | 56.42 | 55.25 | 55.25 | 55.14 | 54.59 | 14.40 | 12.87 | 1.34 | 1.33 | 20.12 |
| Aspect | 1.03 | 1.02 | 1.02 | 1.02 | 1.02 | 1.02 | 1.02 | 1.01 | 1.01 | **0.10** |
| AN | 3.68 | 3.60 | 2.52 | 2.52 | 2.51 | 2.51 | 2.50 | 2.42 | 2.40 | **0.08** |
| BD | 2.94 | 2.92 | 2.90 | 2.82 | 2.80 | 2.78 | 2.72 | 2.72 | 2.70 | **0.16** |
| CAE | 1.78 | 1.78 | 1.62 | 1.62 | 1.61 | 1.61 | 1.61 | 1.60 | 1.58 | **0.36** |
| NAE | 459.60 | 453.71 | 1.97 | 1.95 | 1.95 | 1.95 | 1.95 | 1.95 | 1.94 | **0.19** |
| SOM | 2.88 | 2.70 | 2.58 | 2.56 | 2.54 | 2.53 | 2.49 | 2.49 | 2.48 | **0.11** |

Values in bold means these variables were eliminated in this turn.

After multi-collinearity test, 11 variables were selected and relative weight method was used to choose the relatively important variables for dominant height (Table S4). Only Age, TWQ and PWM showed the most importance for dominant height. And TWQ and PWM were selected to express the parameters in the Gompertz function. The whole model was written as

|  | (S1) |
| --- | --- |

where and are the dominant height and stand age of *l*th measurement of the *k*th plot within *j*th species in *i*th province, respectively; is the error term; and *β*0–*β*8 are model parameters, and are the mean temperature of wettest quarter and precipitation of wettest month of the *i*th plot, respectively. According to the threshold of alpha = 0.05, the parameter which had the largest P-value (most likely equal to zero) was eliminated in each turn. After these, the final dominant height growth model without random parameters was determined and the details were shown in Table S5. The final model was written as Equation (S2).

|  | (S2) |
| --- | --- |

**Table S5.** Details of determining the final dominant height growth model without random parameters.

| **Parameter** | ***p*-Value** | | | | |
| --- | --- | --- | --- | --- | --- |
| **1st** | **2nd** | **3rd** | **4th** | **5th** |
| β0 | 0.0020 | 0.0011 | 0.0079 | 0.6336 | 0.0000 |
| β1 | 0.2318 | 0.2212 | 0.2020 | **0.3227** |  |
| β2 | 0.3102 | 0.1845 | 0.1968 | 0.0000 | 0.0000 |
| β3 | 0.0000 | 0.0000 | 0.0000 | 0.0000 | 0.0000 |
| β4 | 0.6408 | **0.6313** |  |  |  |
| β5 | **0.6548** |  |  |  |  |
| β6 | 0.0810 | 0.0358 | 0.1234 | 0.0029 | 0.0000 |
| β7 | 0.1468 | 0.1785 | 0.1961 | 0.2128 | 0.0000 |
| β8 | 0.0918 | 0.0836 | **0.2029** |  |  |

Values in bold means these parameters were eliminated in this turn.
